# Supplementary material for: Health utility of patients with established rheumatoid arthritis and its influencing factors: a multi-center study in China
Source: Springer Nature journal article supplement (doi:10.1038/s41598-024-64772-4), 2024-06-19
Supplement: MOESM1 [file 41598_2024_64772_MOESM1_ESM.pdf]

## Appendix

### Appendix 1 correlation matrix of Spearman test between the potential factors of EQ-5D-5L utility values of RA patients

| Variable | a      | b      | c      | d      | e      | f      | g      | h      | i      | j      | k      | l      | m      | n      | o      | p      | q      | r      | s      | t      | u      |
|----------|--------|--------|--------|--------|--------|--------|--------|--------|--------|--------|--------|--------|--------|--------|--------|--------|--------|--------|--------|--------|--------|
| <b>b</b> | -0.148 |        |        |        |        |        |        |        |        |        |        |        |        |        |        |        |        |        |        |        |        |
| <b>c</b> | -0.152 | 0.906  |        |        |        |        |        |        |        |        |        |        |        |        |        |        |        |        |        |        |        |
| <b>d</b> | -0.031 | 0.384  | 0.174  |        |        |        |        |        |        |        |        |        |        |        |        |        |        |        |        |        |        |
| <b>e</b> | -0.220 | 0.285  | 0.423  | 0.509  |        |        |        |        |        |        |        |        |        |        |        |        |        |        |        |        |        |
| <b>f</b> | -0.226 | 0.623  | 0.661  | 0.085  | 0.210  |        |        |        |        |        |        |        |        |        |        |        |        |        |        |        |        |
| <b>g</b> | -0.143 | 0.628  | 0.662  | 0.212  | 0.279  | 0.629  |        |        |        |        |        |        |        |        |        |        |        |        |        |        |        |
| <b>h</b> | -0.445 | 0.334  | 0.142  | 0.327  | 0.253  | 0.173  | 0.144  |        |        |        |        |        |        |        |        |        |        |        |        |        |        |
| <b>i</b> | -0.450 | 0.370  | 0.215  | 0.392  | 0.382  | 0.242  | 0.188  | 0.851  |        |        |        |        |        |        |        |        |        |        |        |        |        |
| <b>j</b> | -0.255 | 0.334  | 0.274  | 0.335  | 0.307  | 0.295  | 0.318  | 0.551  | 0.573  |        |        |        |        |        |        |        |        |        |        |        |        |
| <b>k</b> | -0.314 | -0.087 | 0.051  | -0.183 | 0.227  | 0.031  | -0.003 | -0.045 | -0.027 | 0.024  |        |        |        |        |        |        |        |        |        |        |        |
| <b>l</b> | -0.167 | 0.057  | 0.118  | -0.036 | 0.166  | 0.098  | -0.006 | 0.012  | 0.113  | 0.056  | 0.005  |        |        |        |        |        |        |        |        |        |        |
| <b>m</b> | -0.146 | 0.108  | 0.157  | -0.149 | 0.040  | 0.161  | 0.117  | 0.149  | 0.090  | 0.038  | -0.094 | 0.164  |        |        |        |        |        |        |        |        |        |
| <b>n</b> | 0.278  | -0.054 | -0.165 | 0.110  | -0.248 | -0.153 | -0.043 | -0.080 | -0.169 | -0.158 | -0.148 | -0.713 | -0.299 |        |        |        |        |        |        |        |        |
| <b>o</b> | -0.134 | 0.135  | 0.205  | 0.237  | 0.461  | 0.290  | 0.314  | 0.276  | 0.254  | 0.274  | -0.086 | 0.076  | 0.094  | -0.120 |        |        |        |        |        |        |        |
| <b>p</b> | 0.206  | 0.013  | 0.000  | -0.115 | -0.120 | -0.144 | -0.079 | -0.026 | 0.042  | -0.069 | -0.043 | -0.123 | -0.069 | 0.105  | -0.261 |        |        |        |        |        |        |
| <b>q</b> | -0.163 | -0.001 | 0.046  | -0.051 | 0.131  | 0.040  | -0.041 | 0.030  | 0.157  | 0.042  | 0.039  | 0.793  | 0.090  | -0.564 | -0.002 | -0.075 |        |        |        |        |        |
| <b>r</b> | -0.311 | 0.015  | -0.071 | 0.240  | 0.034  | 0.132  | 0.034  | 0.123  | 0.187  | 0.176  | -0.061 | 0.006  | -0.116 | -0.002 | 0.032  | -0.182 | -0.024 |        |        |        |        |
| <b>s</b> | 0.043  | -0.227 | -0.233 | -0.048 | 0.025  | -0.036 | -0.265 | 0.062  | 0.037  | -0.036 | 0.197  | 0.020  | -0.006 | -0.040 | -0.032 | 0.077  | -0.034 | -0.029 |        |        |        |
| <b>t</b> | 0.131  | -0.161 | -0.192 | -0.001 | -0.102 | -0.168 | -0.041 | -0.099 | -0.133 | -0.129 | 0.063  | -0.864 | -0.180 | 0.717  | -0.079 | 0.114  | -0.603 | 0.014  | -0.040 |        |        |
| <b>u</b> | -0.183 | 0.069  | 0.149  | -0.142 | 0.175  | 0.130  | 0.099  | 0.075  | 0.124  | 0.100  | -0.054 | 0.417  | 0.367  | -0.561 | 0.124  | -0.099 | 0.332  | -0.067 | -0.023 | -0.365 |        |
| <b>v</b> | -0.148 | -0.002 | -0.025 | -0.059 | -0.150 | 0.061  | -0.019 | 0.033  | 0.045  | 0.005  | -0.132 | -0.059 | 0.126  | 0.107  | 0.038  | 0.046  | 0.036  | -0.007 | -0.043 | 0.040  | -0.002 |

Note: a: EQ-5D-5L score; b: DAS28-CRP; c: DAS28-ESR; d: CRP; e: ESR; f: TJC; g: SJC; h: PtAAP-VAS; i: PtGADA-VAS; j: PhGADA-VAS; k: Gender; l: Habitation; m: Marriage; n: Education; o: Disease state; p: TM; q: MIT; r: GH; s: Ethnicity; t: Occupation; u: Age

DAS28: disease activity scores including 28 joint counts; ESR: erythrocyte sedimentation rate; CRP: high-sensitivity C-reactive protein; TJC: tender joints count; SJC: swollen joints count; PtAAP-VAS: patient's assessment of arthritis pain; PtGADA-VAS: patient's global assessment of disease activity; PhGADA-VAS: physician's global assessment of disease activity; MIT: Medical insurance type; TM: Treatment methods; GH: General health.

## Appendix 2 Characteristics, patient-/clinician-reported outcomes and associated EQ-5D-5L utility values of RA patients

| Items                              | n (%) / Mean (SD) | Mean HUV (SD) / CHUV | Range  |       | <i>p</i> Value | 95% CI |       |
|------------------------------------|-------------------|----------------------|--------|-------|----------------|--------|-------|
|                                    |                   |                      | Min    | Max   |                |        |       |
| <b>Characteristics</b>             |                   | <b>Mean HUV (SD)</b> |        |       |                |        |       |
| <b>Total</b>                       | 171(100.0%)       | 0.586(0.279)         | -0.193 | 1.000 |                | 0.544  | 0.629 |
| <b>Total (adjusted)</b>            |                   | 0.561                |        |       |                |        |       |
| <b>Gender</b>                      |                   |                      |        |       | 0.0001**       |        |       |
| Male                               | 60(35.1%)         | 0.697(0.233)         | 0.050  | 1.000 |                | 0.637  | 0.758 |
| Female                             | 111(64.9%)        | 0.527(0.285)         | -0.193 | 1.000 |                | 0.473  | 0.580 |
| <b>Age (years)</b>                 |                   |                      |        |       | 0.0008**       |        |       |
| 18-39                              | 32(18.7%)         | 0.738(0.227)         | -0.056 | 1.000 |                | 0.656  | 0.819 |
| 40-49                              | 35(20.5%)         | 0.596(0.234)         | 0.052  | 0.942 |                | 0.516  | 0.677 |
| 50-59                              | 58(33.9%)         | 0.513(0.284)         | -0.193 | 0.942 |                | 0.438  | 0.587 |
| 60-70                              | 46(26.9%)         | 0.567(0.304)         | -0.121 | 1.000 |                | 0.476  | 0.657 |
| <b>Ethnicity</b>                   |                   |                      |        |       | 0.3685         |        |       |
| Han                                | 162(94.7%)        | 0.582(0.282)         | -0.193 | 1.000 |                | 0.538  | 0.625 |
| Other                              | 9(5.3%)           | 0.673(0.212)         | 0.251  | 0.942 |                | 0.510  | 0.836 |
| <b>BMI</b>                         |                   |                      |        |       | 0.0606         |        |       |
| BMI<18.5                           | 19(11.1%)         | 0.700(0.185)         | 0.147  | 1.000 |                | 0.611  | 0.789 |
| 18.5≤BMI<24                        | 95(55.6%)         | 0.601(0.274)         | -0.100 | 0.955 |                | 0.545  | 0.657 |
| 24≤BMI                             | 57(33.3%)         | 0.525(0.302)         | -0.193 | 1.000 |                | 0.445  | 0.605 |
| <b>Habitation</b>                  |                   |                      |        |       | 0.0158*        |        |       |
| Urban                              | 75(43.9%)         | 0.639(0.274)         | -0.193 | 1.000 |                | 0.576  | 0.703 |
| Rural                              | 96(56.1%)         | 0.545(0.278)         | -0.121 | 1.000 |                | 0.489  | 0.601 |
| <b>Marriage</b>                    |                   |                      |        |       | 0.0255*        |        |       |
| Unmarried                          | 12(7.0%)          | 0.740(0.198)         | 0.288  | 0.952 |                | 0.614  | 0.865 |
| Married                            | 94(55.0%)         | 0.606(0.293)         | -0.193 | 1.000 |                | 0.546  | 0.666 |
| Divorce/Widowed                    | 13(7.6%)          | 0.571(0.282)         | 0.095  | 1.000 |                | 0.401  | 0.742 |
| Not reported                       | 52(30.4%)         | 0.520(0.256)         | -0.121 | 0.942 |                | 0.449  | 0.592 |
| <b>Occupation</b>                  |                   |                      |        |       | 0.1703         |        |       |
| Farmer                             | 96(56.1%)         | 0.547(0.280)         | -0.121 | 1.000 |                | 0.491  | 0.604 |
| Worker                             | 40(23.4%)         | 0.648(0.280)         | -0.193 | 0.952 |                | 0.558  | 0.737 |
| Government-affiliated institutions | 7(4.1%)           | 0.727(0.198)         | 0.451  | 1.000 |                | 0.543  | 0.910 |

|                               |             |              |        |       |          |        |       |
|-------------------------------|-------------|--------------|--------|-------|----------|--------|-------|
| Retiree                       | 7(4.1%)     | 0.525(0.396) | -0.100 | 0.942 | 0.0005** | 0.159  | 0.891 |
| Other                         | 21(12.3%)   | 0.623(0.235) | 0.102  | 0.952 |          | 0.516  | 0.730 |
| <b>Education</b>              |             |              |        |       | 0.0005** |        |       |
| Primary school or below       | 74(43.3%)   | 0.508(0.290) | -0.121 | 1.000 |          | 0.441  | 0.575 |
| Middle school                 | 67(39.2%)   | 0.608(0.263) | -0.193 | 0.952 |          | 0.544  | 0.672 |
| Undergraduate or above        | 30(17.5%)   | 0.732(0.224) | -0.056 | 1.000 |          | 0.648  | 0.815 |
| <b>Person's annual income</b> |             |              |        |       | 0.2277   |        |       |
| (0,30000)                     | 31(18.1%)   | 0.556(0.280) | -0.121 | 0.942 |          | 0.453  | 0.659 |
| [30000,60000)                 | 17(9.9%)    | 0.675(0.284) | -0.100 | 0.942 |          | 0.529  | 0.821 |
| ≥60000                        | 16(9.4%)    | 0.647(0.300) | -0.193 | 0.942 |          | 0.487  | 0.807 |
| Not reported                  | 107(62.6%)  | 0.572(0.275) | -0.067 | 1.000 |          | 0.519  | 0.625 |
| <b>Medical insurance type</b> |             |              |        |       | 0.0099** |        |       |
| BMIUE                         | 46(26.9%)   | 0.661(0.298) | -0.193 | 1.000 |          | 0.572  | 0.749 |
| BMIURR                        | 73(42.7%)   | 0.587(0.275) | -0.067 | 1.000 |          | 0.523  | 0.651 |
| Not reported                  | 52(30.4%)   | 0.520(0.256) | -0.121 | 0.942 |          | 0.449  | 0.592 |
| <b>General health</b>         |             |              |        |       | 0.0001** |        |       |
| Good                          | 3(1.8%)     | 0.781(0.099) | 0.703  | 0.893 |          | 0.534  | 1.028 |
| General                       | 131(76.6%)  | 0.634(0.261) | -0.121 | 1.000 |          | 0.589  | 0.679 |
| Bad                           | 26(15.2%)   | 0.449(0.287) | -0.193 | 0.903 |          | 0.333  | 0.565 |
| Very bad                      | 11(6.4%)    | 0.294(0.219) | 0.034  | 0.766 |          | 0.147  | 0.441 |
| <b>Disease stage</b>          |             |              |        |       | 0.0331*  |        |       |
| Mid-term                      | 146(85.4%)  | 0.612(0.259) | -0.193 | 1.000 |          | 0.568  | 0.654 |
| Serious                       | 25(14.6%)   | 0.440(0.350) | -0.100 | 0.955 |          | 0.295  | 0.584 |
| <b>Treatment methods</b>      |             |              |        |       | 0.0230*  |        |       |
| Hospitalization               | 16(9.4%)    | 0.449(0.246) | 0.101  | 0.766 |          | 0.318  | 0.580 |
| Outpatient                    | 155(90.6%)  | 0.601(0.279) | -0.193 | 1.000 |          | 0.556  | 0.645 |
| <b>Das28-CRP</b>              |             |              |        |       | 0.6581   |        |       |
| Remission                     | 3(1.75%)    | 0.744(0.026) | 0.724  | 0.773 |          | 0.679  | 0.808 |
| Low                           | 3(1.75%)    | 0.556(0.417) | 0.095  | 0.907 |          | -0.480 | 1.591 |
| Moderate                      | 54(31.58%)  | 0.606(0.281) | -0.100 | 0.952 |          | 0.529  | 0.683 |
| High                          | 111(64.91%) | 0.574(0.280) | -0.193 | 1.000 |          | 0.521  | 0.626 |
| <b>Das28-ESR</b>              |             |              |        |       | 0.1508   |        |       |
| Remission                     | 4(2.34%)    | 0.766(0.127) | 0.665  | 0.942 |          | 0.564  | 0.967 |
| Low                           | 6(3.51%)    | 0.589(0.333) | 0.095  | 0.942 |          | 0.239  | 0.938 |
| Moderate                      | 41(23.98%)  | 0.658(0.245) | 0.033  | 0.952 |          | 0.581  | 0.736 |

|                                    |               |                 |             |        |         |         |         |
|------------------------------------|---------------|-----------------|-------------|--------|---------|---------|---------|
| High                               | 120(70.18%)   | 0.556(0.287)    | -0.193      | 1.000  |         | 0.504   | 0.608   |
| <b>Patient-reported Outcomes</b>   |               | <b>CHUV</b>     |             |        |         |         |         |
| PtAAP-VAS                          | 63.92(18.20)  | -0.0062         | 7.00        | 100.00 | 0.000** | -0.0084 | -0.0041 |
| PtGADA-VAS                         | 64.49(19.23)  | -0.0061         | 8.00        | 100.00 | 0.000** | -0.0082 | -0.0041 |
| <b>Clinician-reported Outcomes</b> |               | <b>MIS (SD)</b> | <b>CHUV</b> |        |         |         |         |
| ESR                                | 48.89 (29.26) | -0.0028         | 2.00        | 121.00 | 0.000** | -0.0042 | -0.0014 |
| CRP                                | 30.60 (36.40) | -0.0009         | 0.50        | 177.10 | 0.138   | -0.0021 | 0.0003  |
| SJC                                | 14.40 (9.12)  | -0.0043         | 2.00        | 54.00  | 0.067   | -0.0090 | 0.0003  |
| TJC                                | 23.51 (14.53) | -0.0024         | 5.00        | 68.00  | 0.113   | -0.0053 | 0.0006  |
| DAS28-ESR                          | 5.58 (1.36)   | -0.0482         | 1.77        | 9.09   | 0.002** | -0.0788 | -0.0176 |
| DAS29-CRP                          | 5.46 (1.20)   | -0.0453         | 2.01        | 8.32   | 0.011*  | -0.0803 | -0.0104 |
| PhGADA-VAS                         | 63.04 (14.22) | -0.0052         | 21.50       | 97.00  | 0.000** | -0.0081 | -0.0023 |

Note: \* $p < 0.05$ , \*\* $p < 0.01$ ; SD: standard deviation; CHUV: coefficient of health utility value; MDEUS: median EQ-5D-5L utility score; CI: Confidence Interval; BMIUE: Basic medical insurance for urban employees; BMIURR: Basic medical insurance for urban and rural residents; PtAAP-VAS: patient's assessment of arthritis pain; PtGADA-VAS: patient's global assessment of disease activity; PhGADA-VAS: physician's global assessment of disease activity; ESR: erythrocyte sedimentation rate; CRP: high-sensitivity C-reactive protein; SJC: swollen joints count; TJC: tender joints count; DAS28: disease activity scores including 28 joint counts; MIS: mean index score.

**Appendix 3 The proportion of reporting problems on EQ-5D-5L dimensions of RA patients with various characteristics**

| Characteristics       |                                    | Mobility        |                | Self-care       |                | Usual activities |                | Pain/Discomfort |                | Anxiety/Depression |                |
|-----------------------|------------------------------------|-----------------|----------------|-----------------|----------------|------------------|----------------|-----------------|----------------|--------------------|----------------|
|                       |                                    | % With Problems | <i>p</i> Value | % With Problems | <i>p</i> Value | % With Problems  | <i>p</i> Value | % With Problems | <i>p</i> Value | % With Problems    | <i>p</i> Value |
| <b>Total</b>          |                                    | 76.02%          |                | 72.51%          |                | 74.85%           |                | 84.21%          |                | 64.33%             |                |
| <b>Total (Adjust)</b> |                                    | 80.91%          |                | 76.59%          |                | 81.02%           |                | 83.64%          |                | 65.33%             |                |
| <b>Gender</b>         |                                    |                 | 0.0005**       |                 | 0.0036**       |                  | 0.0001**       |                 | 0.6834         |                    | 0.4724         |
|                       | Male                               | 55.00%          |                | 55.00%          |                | 48.33%           |                | 86.67%          |                | 60.00%             |                |
|                       | Female                             | 87.39%          |                | 81.98%          |                | 89.19%           |                | 82.88%          |                | 66.67%             |                |
| <b>Age</b>            |                                    |                 | 0.8703         |                 | 0.9758         |                  | 0.5351         |                 | 0.0232*        |                    | 0.1201         |
|                       | 18-39                              | 68.75%          |                | 75.00%          |                | 62.50%           |                | 56.25%          |                | 46.88%             |                |
|                       | 40-49                              | 80.00%          |                | 74.29%          |                | 77.14%           |                | 94.29%          |                | 68.57%             |                |
|                       | 50-59                              | 77.59%          |                | 72.41%          |                | 81.03%           |                | 91.38%          |                | 75.86%             |                |
|                       | 60-70                              | 76.09%          |                | 69.57%          |                | 73.91%           |                | 86.96%          |                | 58.70%             |                |
| <b>Ethnicity</b>      |                                    |                 | 0.9256         |                 | 0.7556         |                  | 0.8763         |                 | 0.4006         |                    | 0.2899         |
|                       | Han                                | 75.93%          |                | 72.84%          |                | 74.69%           |                | 83.33%          |                | 65.43%             |                |
|                       | Other                              | 77.78%          |                | 66.67%          |                | 77.78%           |                | 100.00%         |                | 44.44%             |                |
| <b>BMI</b>            |                                    |                 | 0.5527         |                 | 0.1676         |                  | 0.4530         |                 | 0.2216         |                    | 0.1332         |
|                       | BMI<18.5                           | 68.42%          |                | 94.74%          |                | 89.47%           |                | 63.16%          |                | 47.37%             |                |
|                       | 18.5≤BMI<24                        | 73.68%          |                | 67.37%          |                | 74.74%           |                | 85.26%          |                | 61.05%             |                |
|                       | 24≤BMI                             | 82.46%          |                | 73.68%          |                | 70.18%           |                | 89.47%          |                | 75.44%             |                |
| <b>Habitation</b>     |                                    |                 | 0.1817         |                 | 0.0892         |                  | 0.1713         |                 | 0.4006         |                    | 0.9478         |
|                       | Urban                              | 69.33%          |                | 64.00%          |                | 68.00%           |                | 80.00%          |                | 64.00%             |                |
|                       | Rural                              | 81.25%          |                | 79.17%          |                | 80.21%           |                | 87.50%          |                | 64.58%             |                |
| <b>Marriage</b>       |                                    |                 | 0.2717         |                 | 0.6089         |                  | 0.2202         |                 | 0.0110*        |                    | 0.3020         |
|                       | Unmarried                          | 66.67%          |                | 91.67%          |                | 66.67%           |                | 41.67%          |                | 58.33%             |                |
|                       | Married                            | 72.34%          |                | 71.28%          |                | 68.09%           |                | 79.79%          |                | 59.57%             |                |
|                       | Divorce/ Widowed                   | 61.54%          |                | 61.54%          |                | 76.92%           |                | 92.31%          |                | 53.85%             |                |
|                       | Not reported                       | 88.46%          |                | 73.08%          |                | 88.46%           |                | 100.00%         |                | 76.92%             |                |
| <b>Occupation</b>     |                                    |                 | 0.8855         |                 | 0.4108         |                  | 0.6206         |                 | 0.3779         |                    | 0.9916         |
|                       | Farmer                             | 80.21%          |                | 78.13%          |                | 79.17%           |                | 88.54%          |                | 63.54%             |                |
|                       | Worker                             | 70.00%          |                | 57.50%          |                | 62.50%           |                | 82.50%          |                | 65.00%             |                |
|                       | Government-affiliated institutions | 71.43%          |                | 85.71%          |                | 71.43%           |                | 42.86%          |                | 57.14%             |                |

|                               |         |         |          |         |         |
|-------------------------------|---------|---------|----------|---------|---------|
| Retiree                       | 71.43%  | 71.43%  | 71.43%   | 85.71%  | 71.43%  |
| Other                         | 71.43%  | 71.43%  | 80.95%   | 80.95%  | 66.67%  |
| <b>Education</b>              | 0.3952  | 0.3328  | 0.0166*  | 0.1792  | 0.8839  |
| Primary school or below       | 82.43%  | 79.73%  | 89.19%   | 86.49%  | 66.22%  |
| Middle school                 | 73.13%  | 68.66%  | 65.67%   | 89.55%  | 64.18%  |
| Undergraduate or above        | 66.67%  | 63.33%  | 60.00%   | 66.67%  | 60.00%  |
| <b>Person's annual income</b> | 0.3404  | 0.9521  | 0.3767   | 0.2002  | 0.5122  |
| (0,30000)                     | 83.87%  | 77.42%  | 77.42%   | 100.00% | 64.52%  |
| [30000,60000)                 | 52.94%  | 70.59%  | 52.94%   | 64.71%  | 64.71%  |
| [60000,+∞)                    | 75.00%  | 75.00%  | 68.75%   | 75.00%  | 50.00%  |
| Not reported                  | 77.57%  | 71.03%  | 78.50%   | 84.11%  | 67.29%  |
| <b>Medical insurance type</b> | 0.1591  | 0.2330  | 0.0396*  | 0.0546  | 0.1629  |
| BMIUE                         | 67.39%  | 60.87%  | 58.70%   | 73.91%  | 60.87%  |
| BMIURR                        | 72.60%  | 79.45%  | 75.34%   | 79.45%  | 57.53%  |
| Not reported                  | 88.46%  | 73.08%  | 88.46%   | 100.00% | 76.92%  |
| <b>Health status</b>          | 0.1765  | 0.3881  | 0.2407   | 0.9358  | 0.0205* |
| Good                          | 66.67%  | 66.67%  | 33.33%   | 100.00% | 33.33%  |
| General                       | 70.99%  | 69.47%  | 71.76%   | 83.21%  | 58.02%  |
| Bad                           | 96.15%  | 76.92%  | 88.46%   | 88.46%  | 84.62%  |
| Very bad                      | 90.91%  | 100.00% | 90.91%   | 81.82%  | 100.00% |
| <b>Disease stage</b>          | 0.4560  | 0.4842  | 0.2192   | 0.6940  | 0.0660  |
| Middle                        | 74.66%  | 71.23%  | 72.60%   | 84.93%  | 60.96%  |
| Advanced                      | 84.00%  | 80.00%  | 88.00%   | 80.00%  | 84.00%  |
| <b>Das28-CRP</b>              |         |         |          |         |         |
| Remission                     | 0.6509  | 0.3498  | 0.0662   | 0.0733  | 0.9744  |
| Low                           | 100.00% | 100.00% | 100.00%  | 33.33%  | 66.67%  |
| Moderate                      | 66.67%  | 100.00% | 100.00%  | 66.67%  | 66.67%  |
| High                          | 72.22%  | 66.67%  | 62.96%   | 83.33%  | 66.67%  |
| <b>Das28-ESR</b>              | 77.48%  | 73.87%  | 79.28%   | 86.49%  | 63.06%  |
| Remission                     |         |         |          |         |         |
| Low                           | 0.0592  | 0.5956  | 0.0049** | 0.0733  | 0.1925  |
| Moderate                      | 75.00%  | 50.00%  | 75.00%   | 75.00%  | 25.00%  |
| High                          | 66.67%  | 83.33%  | 83.33%   | 83.33%  | 66.67%  |
| <b>Treatment methods</b>      | 0.4050  | 0.5262  | 0.9919   | 0.8114  | 0.4387  |
| Hospitalization               | 87.50%  | 81.25%  | 75.00%   | 87.50%  | 75.00%  |

|            |        |        |        |        |        |
|------------|--------|--------|--------|--------|--------|
| Outpatient | 74.84% | 71.61% | 74.84% | 83.87% | 63.23% |
|------------|--------|--------|--------|--------|--------|

Note: \* $p < 0.05$ , \*\* $p < 0.01$ ; BMIUE: Basic medical insurance for urban employees; BMIURR: Basic medical insurance for urban and rural residents.

#### Appendix 4 EQ-VAS score of RA patients

| EQ-VAS          | Mean (SD)    | Median | Range |       | 95% CI |       |
|-----------------|--------------|--------|-------|-------|--------|-------|
|                 |              |        | Min   | Max   |        |       |
| female          | 47.22(19.75) | 49.00  | 10.00 | 90.00 | 43.50  | 50.93 |
| male            | 47.41(19.59) | 45.00  | 10.00 | 90.00 | 42.34  | 52.47 |
| Total           | 47.28(19.64) | 48.00  | 10.00 | 90.00 | 44.32  | 50.25 |
| Total(adjusted) | 47.25        |        |       |       |        |       |

Note: SD: Standard deviation; CI: Confidence interval.

#### Appendix 5 VIF of variables included in the regression model

| Variables         |                 | VIF  | 1/VIF |
|-------------------|-----------------|------|-------|
| Age               | 18-39           |      |       |
|                   | 40-49           | 1.76 | 0.568 |
|                   | 50-59           | 2.28 | 0.439 |
|                   | 60-70           | 2.18 | 0.460 |
| Gender            | Male            |      |       |
|                   | Female          | 1.14 | 0.881 |
| BMI               | BMI<18.5        |      |       |
|                   | 18.5≤BMI<24     | 2.95 | 0.339 |
|                   | 24≤BMI          | 2.95 | 0.339 |
| Habitation        | Urban           |      |       |
|                   | Rural           | 1.21 | 0.824 |
| Disease stage     | Mid-term        |      |       |
|                   | Serious         | 1.17 | 0.851 |
| Treatment methods | Hospitalization |      |       |
|                   | Outpatient      | 1.13 | 0.888 |
| PtGADA-VAS        |                 | 1.16 | 0.863 |
| DAS28-ESR         |                 | 1.13 | 0.882 |
| Mean VIF          |                 | 1.73 |       |

Note: VIF: variance inflation factor.



## **Appendix 6 Questionnaires on the Quality of Life of Chinese RA Patients (Chinese to English version)**

Survey ID:   □□ □□ □□ □□□ □

Interviewer: \_\_\_\_\_ Interviewer ID:   □□

Survey Date: \_\_\_\_\_

### **No.1 Questionnaires for Patient**

#### **EQ-5D-5L**

**Under each heading, please tick the ONE box that best describes your health TODAY.**

##### **MOBILITY**

- |                                           |                          |
|-------------------------------------------|--------------------------|
| I have no problems in walking about       | <input type="checkbox"/> |
| I have slight problems in walking about   | <input type="checkbox"/> |
| I have moderate problems in walking about | <input type="checkbox"/> |
| I have severe problems in walking about   | <input type="checkbox"/> |
| I am unable to walk about                 | <input type="checkbox"/> |

##### **SELF-CARE**

- |                                                     |                          |
|-----------------------------------------------------|--------------------------|
| I have no problems washing or dressing myself       | <input type="checkbox"/> |
| I have slight problems washing or dressing myself   | <input type="checkbox"/> |
| I have moderate problems washing or dressing myself | <input type="checkbox"/> |
| I have severe problems washing or dressing myself   | <input type="checkbox"/> |
| I am unable to wash or dress myself                 | <input type="checkbox"/> |

##### **USUAL ACTIVITIES** (e.g. work, study, housework, family or leisure activities)

- |                                                    |                          |
|----------------------------------------------------|--------------------------|
| I have no problems doing my usual activities       | <input type="checkbox"/> |
| I have slight problems doing my usual activities   | <input type="checkbox"/> |
| I have moderate problems doing my usual activities | <input type="checkbox"/> |
| I have severe problems doing my usual activities   | <input type="checkbox"/> |
| I am unable to do my usual activities              | <input type="checkbox"/> |

**PAIN / DISCOMFORT**

- |                                    |                          |
|------------------------------------|--------------------------|
| I have no pain or discomfort       | <input type="checkbox"/> |
| I have slight pain or discomfort   | <input type="checkbox"/> |
| I have moderate pain or discomfort | <input type="checkbox"/> |
| I have severe pain or discomfort   | <input type="checkbox"/> |
| I have extreme pain or discomfort  | <input type="checkbox"/> |

**ANXIETY / DEPRESSION**

- |                                      |                          |
|--------------------------------------|--------------------------|
| I am not anxious or depressed        | <input type="checkbox"/> |
| I am slightly anxious or depressed   | <input type="checkbox"/> |
| I am moderately anxious or depressed | <input type="checkbox"/> |
| I am severely anxious or depressed   | <input type="checkbox"/> |
| I am extremely anxious or depressed  | <input type="checkbox"/> |

We would like to know how good or bad your health is TODAY.

This scale is numbered from 0 to 100.

100 means the best health you can imagine.

0 means the worst health you can imagine.

Mark an X on the scale to indicate how your health is TODAY.

Now, please write the number you marked on the scale in the box below.

YOUR HEALTH TODAY =

The best health  
you can imagine

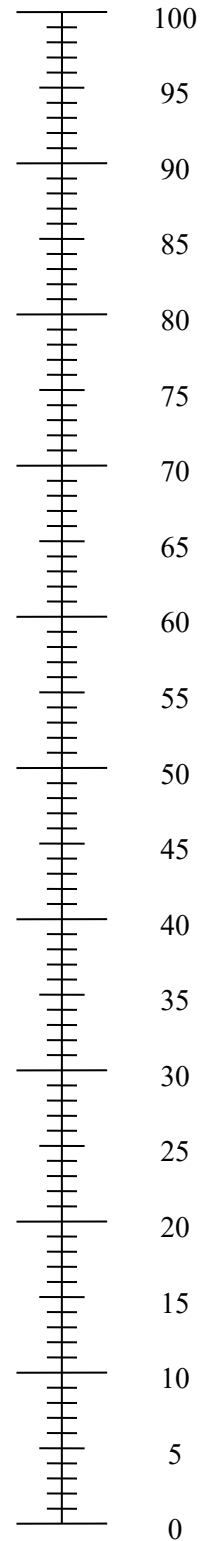

The worst health  
you can imagine

**The patient's assessment of arthritis pain visual analogue scale (PtAAP-VAS)**

Please mark a vertical line on the scale below to indicate the level of pain you are experiencing due to arthritis TODAY.

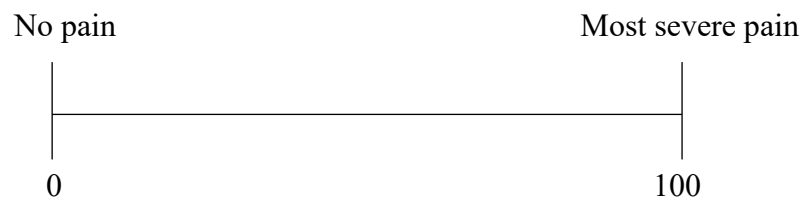

**The patient's global assessment of disease activity visual analogue scale (PtGADA-VAS)**

Please consider the impact of arthritis on all aspects of your life, then mark a vertical line on the scale below to indicate how you feel TODAY.

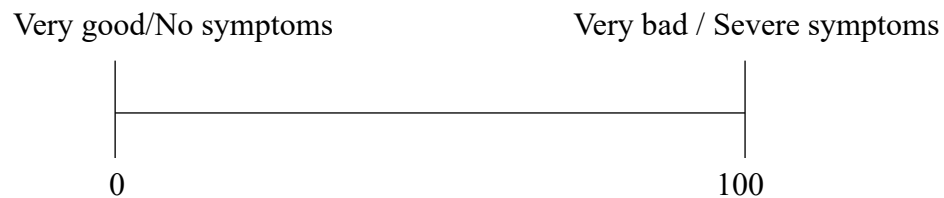

### Patients' demographic characteristics

Here are some questions about your basic information. Please put a check mark "√" next to the options that apply to your personal situation, and fill in the blank with the information you need to provide. Note: This is an anonymous survey, your personal information will not be disclosed, and there are no right or wrong answers to your responses.

1. What is your gender? ☐ Male ☐ Female
2. What is your age? \_\_\_\_\_ Year
3. What is your ethnicity? \_\_\_\_\_
4. What are your weight and height \_\_\_\_\_ kg \_\_\_\_\_ cm respectively?
5. Where do you currently live? ☐ Rural ☐ Urban
6. What is your marital status? ☐ Unmarried ☐ Married  
☐ Divorce ☐ Widowed
7. What is your level of education? ☐ Primary school or below ☐ Middle school ☐ Undergraduate or above
8. What is your Occupation? ☐ Farmer ☐ Worker  
☐ Government-affiliated institutions  
☐ Retiree ☐ Other
9. What is your treatment methods? ☐ Hospitalization ☐ Outpatient
10. How much is your personal annual \_\_\_\_\_ ten thousand yuan income? (ten thousand yuan)
11. What is your medical insurance type? ☐ Basic medical insurance for urban

employees

☐ Basic medical insurance for urban and rural residents

12. How do you feel about your current health status?

☐ Good      ☐ General  
☐ Bad      ☐ Very bad

## No.2 Questionnaires for Physician

The following questions should be completed by the patient's attending physician.

1. Patient's disease stage

☐ Stage I (Early stage)

☐ Stage II (Middle stage)

☐ Stage III (Advanced stage)

2. Patient's erythrocyte sedimentation rate (ESR, unit: mm/h) \_\_\_\_\_

3. Patient's high-sensitivity C-reactive protein (CRP unit: mg/L) \_\_\_\_\_

### The physician's global assessment of disease activity visual analogue scale (PhGADA-VAS)

Please mark a vertical line on the scale below to assess the overall condition of signs and symptoms of rheumatoid arthritis in the subjects as well as the functional ability of the subjects.

Very good/No symptoms

Very bad/Severe and intolerable symptoms

No limit for Normal activities

Unable to perform any normal activities

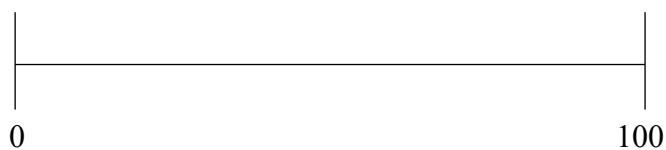

### Assessment of swollen joints count and tender joints count

[illegible]



|                          |                          |                          |                          |                          |                          |                                                     |                          |                          |                          |                          |                          |                          |
|--------------------------|--------------------------|--------------------------|--------------------------|--------------------------|--------------------------|-----------------------------------------------------|--------------------------|--------------------------|--------------------------|--------------------------|--------------------------|--------------------------|
| <input type="checkbox"/> | <input type="checkbox"/> | <input type="checkbox"/> |                          |                          |                          | Hip joint                                           | <input type="checkbox"/> | <input type="checkbox"/> | <input type="checkbox"/> |                          |                          |                          |
| <input type="checkbox"/> | <input type="checkbox"/> | <input type="checkbox"/> | <input type="checkbox"/> | <input type="checkbox"/> | <input type="checkbox"/> | Knee joint                                          | <input type="checkbox"/> | <input type="checkbox"/> | <input type="checkbox"/> | <input type="checkbox"/> | <input type="checkbox"/> | <input type="checkbox"/> |
| <input type="checkbox"/> | <input type="checkbox"/> | <input type="checkbox"/> | <input type="checkbox"/> | <input type="checkbox"/> | <input type="checkbox"/> | Ankle joint                                         | <input type="checkbox"/> | <input type="checkbox"/> | <input type="checkbox"/> | <input type="checkbox"/> | <input type="checkbox"/> | <input type="checkbox"/> |
| <input type="checkbox"/> | <input type="checkbox"/> | <input type="checkbox"/> | <input type="checkbox"/> | <input type="checkbox"/> | <input type="checkbox"/> | Tarsal bone                                         | <input type="checkbox"/> | <input type="checkbox"/> | <input type="checkbox"/> | <input type="checkbox"/> | <input type="checkbox"/> | <input type="checkbox"/> |
| <input type="checkbox"/> | <input type="checkbox"/> | <input type="checkbox"/> | <input type="checkbox"/> | <input type="checkbox"/> | <input type="checkbox"/> | First metatarsophalangeal joint                     | <input type="checkbox"/> | <input type="checkbox"/> | <input type="checkbox"/> | <input type="checkbox"/> | <input type="checkbox"/> | <input type="checkbox"/> |
| <input type="checkbox"/> | <input type="checkbox"/> | <input type="checkbox"/> | <input type="checkbox"/> | <input type="checkbox"/> | <input type="checkbox"/> | Second metatarsophalangeal joint                    | <input type="checkbox"/> | <input type="checkbox"/> | <input type="checkbox"/> | <input type="checkbox"/> | <input type="checkbox"/> | <input type="checkbox"/> |
| <input type="checkbox"/> | <input type="checkbox"/> | <input type="checkbox"/> | <input type="checkbox"/> | <input type="checkbox"/> | <input type="checkbox"/> | Third metatarsophalangeal joint                     | <input type="checkbox"/> | <input type="checkbox"/> | <input type="checkbox"/> | <input type="checkbox"/> | <input type="checkbox"/> | <input type="checkbox"/> |
| <input type="checkbox"/> | <input type="checkbox"/> | <input type="checkbox"/> | <input type="checkbox"/> | <input type="checkbox"/> | <input type="checkbox"/> | Fourth metatarsophalangeal joint                    | <input type="checkbox"/> | <input type="checkbox"/> | <input type="checkbox"/> | <input type="checkbox"/> | <input type="checkbox"/> | <input type="checkbox"/> |
| <input type="checkbox"/> | <input type="checkbox"/> | <input type="checkbox"/> | <input type="checkbox"/> | <input type="checkbox"/> | <input type="checkbox"/> | Fifth metatarsophalangeal joint                     | <input type="checkbox"/> | <input type="checkbox"/> | <input type="checkbox"/> | <input type="checkbox"/> | <input type="checkbox"/> | <input type="checkbox"/> |
| <input type="checkbox"/> | <input type="checkbox"/> | <input type="checkbox"/> | <input type="checkbox"/> | <input type="checkbox"/> | <input type="checkbox"/> | Hallux interphalangeal joint                        | <input type="checkbox"/> | <input type="checkbox"/> | <input type="checkbox"/> | <input type="checkbox"/> | <input type="checkbox"/> | <input type="checkbox"/> |
| <input type="checkbox"/> | <input type="checkbox"/> | <input type="checkbox"/> | <input type="checkbox"/> | <input type="checkbox"/> | <input type="checkbox"/> | Proximal interphalangeal joint of<br>the second toe | <input type="checkbox"/> | <input type="checkbox"/> | <input type="checkbox"/> | <input type="checkbox"/> | <input type="checkbox"/> | <input type="checkbox"/> |
| <input type="checkbox"/> | <input type="checkbox"/> | <input type="checkbox"/> | <input type="checkbox"/> | <input type="checkbox"/> | <input type="checkbox"/> | Proximal interphalangeal joint of<br>the third toe  | <input type="checkbox"/> | <input type="checkbox"/> | <input type="checkbox"/> | <input type="checkbox"/> | <input type="checkbox"/> | <input type="checkbox"/> |
| <input type="checkbox"/> | <input type="checkbox"/> | <input type="checkbox"/> | <input type="checkbox"/> | <input type="checkbox"/> | <input type="checkbox"/> | Proximal interphalangeal joint of<br>the fourth toe | <input type="checkbox"/> | <input type="checkbox"/> | <input type="checkbox"/> | <input type="checkbox"/> | <input type="checkbox"/> | <input type="checkbox"/> |
| <input type="checkbox"/> | <input type="checkbox"/> | <input type="checkbox"/> | <input type="checkbox"/> | <input type="checkbox"/> | <input type="checkbox"/> | Proximal interphalangeal joint of<br>the fifth toe  | <input type="checkbox"/> | <input type="checkbox"/> | <input type="checkbox"/> | <input type="checkbox"/> | <input type="checkbox"/> | <input type="checkbox"/> |

Tender joints count: \_\_\_\_/\_\_\_\_

Swollen joints count: \_\_\_\_/\_\_\_\_
